# Supplementary material
Source: Springer Nature journal article supplement (https://www.springermedizin.de/resource/supplementary/12967_2013_1546_MOESM5_ESM.pdf/9574316)

**A**

DC + eGFP  
DC + Survivin  
DC + Ubi-Survivin

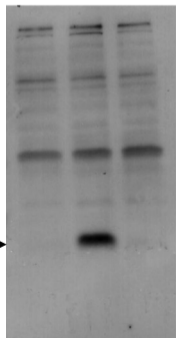

4 hrs

**B**

GFP

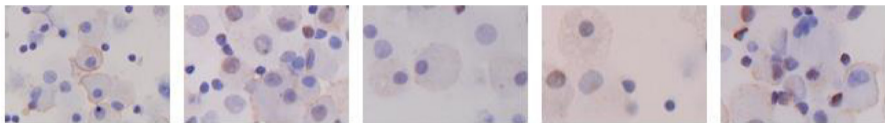

Survivin

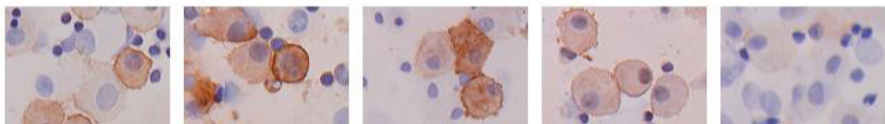

Ubi-Survivin

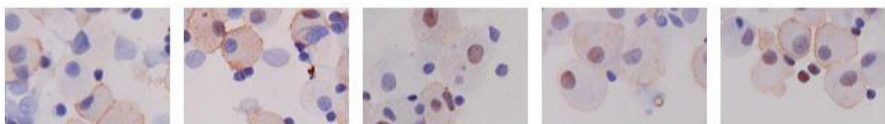

2 hrs

4 hrs

6 hrs

8 hrs

24 hrs

Supplement: MOESM5 [file 9574316]
